# Supplementary material
Source: Springer Nature journal article supplement (https://www.springermedizin.de/resource/supplementary/12990_2009_199_MOESM5_ESM.pdf/9612770)

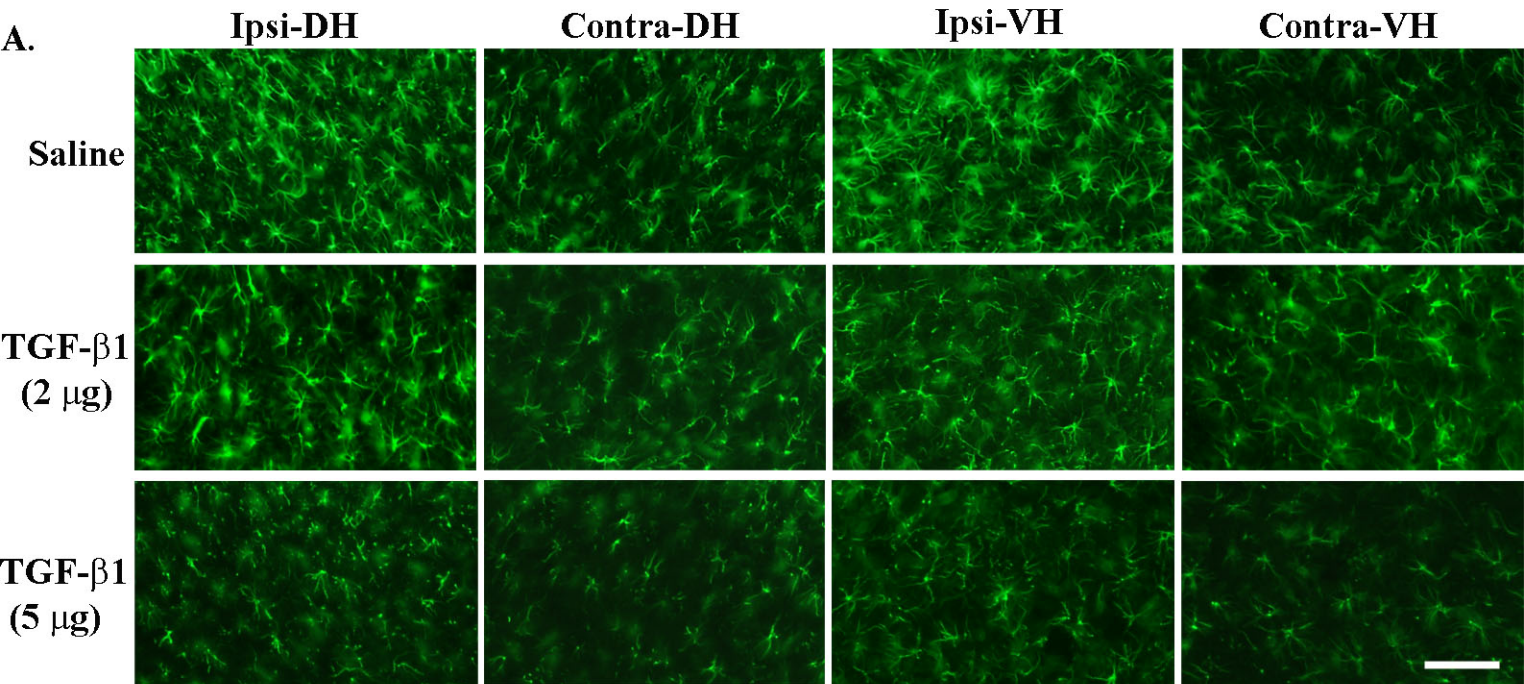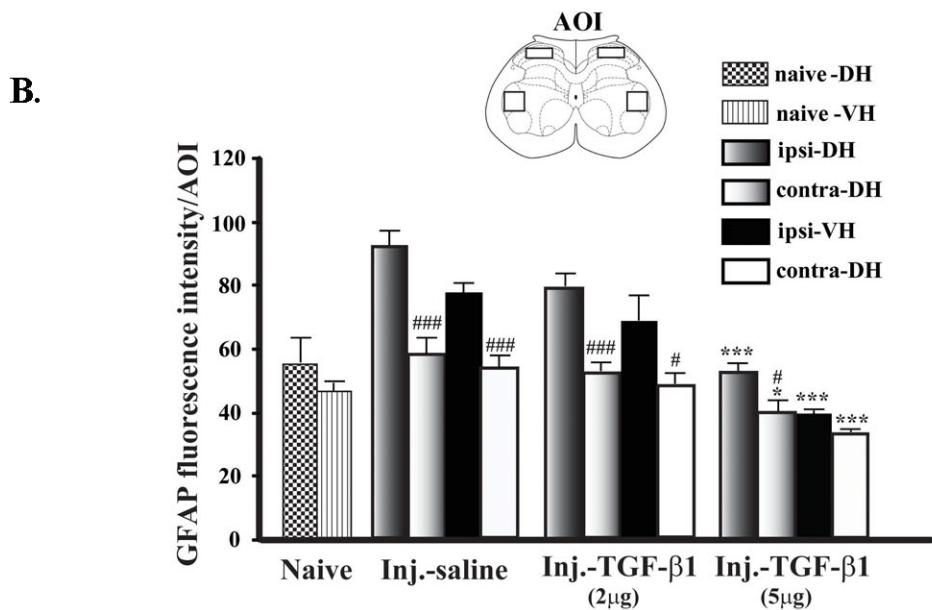

Supplement: MOESM5 [file 9612770]
